# Supplementary material
Source: PubMed Central journal article supplement (PMC4854680)
Supplement: supp_pp.15.01754_PP2015-01754R1_FigS1_4_and_Table_S1.pdf [file supp_pp.15.01754_PP2015-01754R1_FigS1_4_and_Table_S1.pdf]

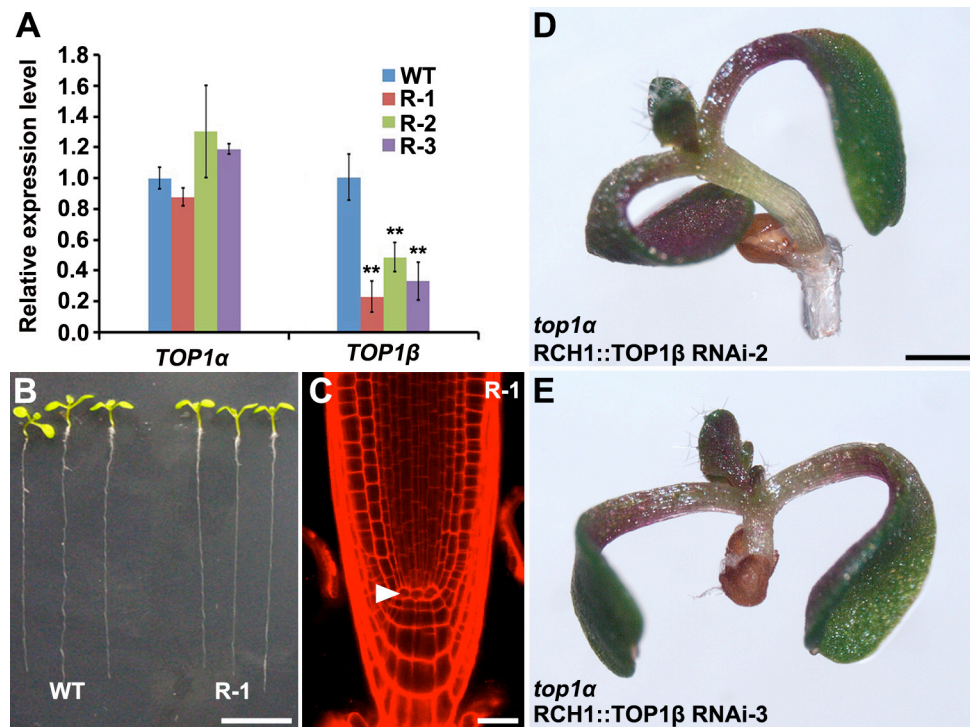

**Supplemental Figure S1.** *RCH1::TOP1β RNAi*-mediated down-regulation of *TOP1β* had no visible effect on WT but caused a rootless phenotype in *top1α*.

A, qRT-PCR analysis of *TOP1α* and *TOP1β* transcription in roots of WT and three different *RCH1::TOP1β RNAi* transgenic lines (R-1, R-2 and R-3). Note that the *RCH1::TOP1β RNAi* transgene specifically and significantly reduced the expression of endogenous *TOP1β* in the WT background. Transcript levels of *TOP1α* and *TOP1β* in WT roots were set to 1. Error bars represent standard deviation (SD) from three independent experiments. \*\*,  $P < 0.01$ ,  $t$ -test. B, Phenotype of 10-day-old WT and R-1 seedlings. No visible difference between WT and R-1 seedlings were observed, in agreement with the *top1β* null mutant phenotype. Scale bar, 1 cm. C, Root tip of an R-1 seedling. Root cells were counterstained (in red) with propidium iodide (PI) and imaged with confocal microscopy. PI is excluded from entering live cells but penetrated into dead cells. Arrowheads point to the quiescent center (QC). Scale bar, 25  $\mu$ m. D and E, Seedling phenotypes of two additional transgenic lines expressing the *RCH1::TOP1β RNAi* transgene in *top1α*. Scale bar, 1 cm.

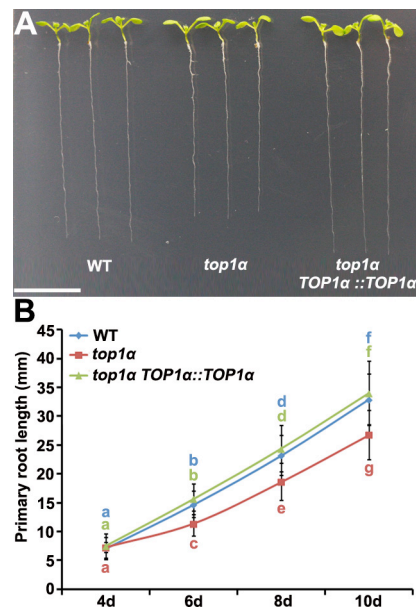

**Supplemental Figure S2.** Expression of WT *TOP1α* under the control of its native promoter (*TOP1α::TOP1α*) fully complemented the root growth defect of *top1α*. A, Phenotypes of 10-day-old WT, *top1α*, and *top1α TOP1α::TOP1α* seedlings. Scale bar, 1cm. B, Time-course analysis of root lengths of WT, *top1α*, and *top1α TOP1α::TOP1α* seedlings. Measurements were performed on the indicated days. Error bars represent SD (N > 20). Bars with different letters are significantly different at  $P < 0.01$ , *t*-test.

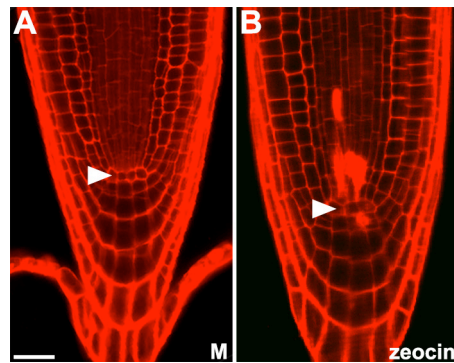

**Supplemental Figure S3.** Zeocin induces preferential death of SSCs in the Arabidopsis root.

A and B, Root tips of WT seedlings, which were mock-treated for 24 h (A) or treated with 13  $\mu$ M zeocin for 24 h (B). Root cells were counterstained (in red) with PI and imaged with confocal microscopy. PI outlined live cells but penetrated into dead cells. Arrowheads point to the quiescent center (QC). Scale bar, 25  $\mu$ m.

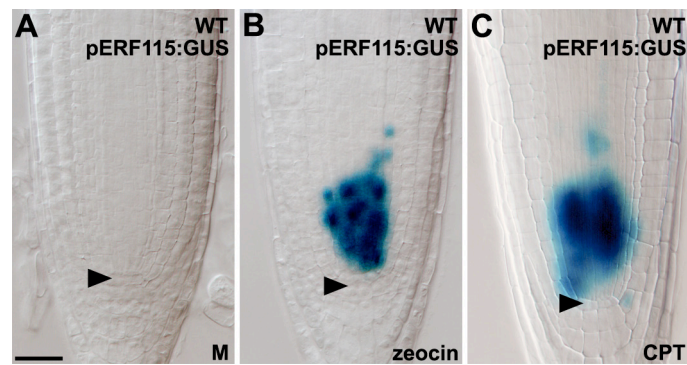

**Supplemental Figure S4.** Similar *ERF115* expression patterns were observed in a previously reported *pERF115:GUS* transgenic line. A to C, Expression (stained in blue) of *pERF115:GUS* (Heyman et al., 2013) in root tips of WT seedlings, which were treated for 24 h with mock (A), 13  $\mu$ M zeocin (B) or 100 nM CPT (C). Scale bar, 50  $\mu$ m.

Zhang et al – Table S1

| Experiments / Primer names | Sequences (5' to 3')                                                       | Materials        |
|----------------------------|----------------------------------------------------------------------------|------------------|
| <b>Genotyping</b>          |                                                                            |                  |
| top1α-LP                   | ACTGTGGAACCACTTGTATGC                                                      |                  |
| top1α-RP                   | ACGAAAACAAAACCCCTCAAGG                                                     |                  |
| top1β-LP                   | TTCCAGAGTGTITTTGCATC                                                       |                  |
| top1β-RP                   | GGTAAGAAATGGAAAGCAGG                                                       |                  |
| LBb1.3                     | ATTTTGCCGATTTTCGGAAC                                                       |                  |
| <b>Cloning</b>             |                                                                            |                  |
| 300CDS-PF                  | ATACTCGAGATGGGCACTGAAACAGTTTC                                              | 35S::TOP1α       |
| 300CDS-PR                  | GGGACGGCCGAGAAATCTGTACTC                                                   |                  |
| 300LIC27-PF                | TAGTTGGAATAGGTTTCATGGGCACTGAAACAGTTTC                                      | TOP1α::TOP1α     |
| 300LIC27-PR                | AGTATGGAGTTGGGTTCCATCTTACGACAAAACAGAGG                                     |                  |
| 300promoter-Acc65I-PF      | TTGGGTACC GTTCTGTTGAGGCCAGTTTC                                             |                  |
| 300promoter-XhoI-PR        | ATACTCGAGTCCCGAAAAGAACACGTTG                                               |                  |
| SHR-PF                     | CATGGTACCAGAAGCAGAGCGGTGGGGTTTC                                            |                  |
| SHR-PR                     | CATCTCGAGTTTTTTTTTAAATGAATAAGAAAATGAATAGAAGAAAAGG                          | SHR::TOP1α       |
| SCR-PF                     | CATGGTACCGTCCGTGTCTCATCGCGTAG                                              |                  |
| SCR-PR                     | CATCTCGAGGGAGATTGAAGGGTTGTTGGTC                                            | SCR::TOP1α       |
| 300-3M-F                   | CACGTCTAAGATCAGCTACCTGGATCC                                                | TOP1α N871S      |
| 300-3M-R                   | GGATCCAGGTAGCTGATCTTAGACGTG                                                |                  |
| 300promoterF               | TTGGGTACC GTTCTGTTGAGGCCAGTTTC                                             | TOP1α::GUS       |
| 300promoterR               | ATACTCGAGTCCCGAAAAGAACACGTTG                                               |                  |
| 310promoterF               | TTGGGTACTCGATTCCGTAGGGTTATTG                                               | TOP1β::GUS       |
| 310promoterR               | ATACTCGAGCCAACAAGGCCAAGTTATTACAC                                           |                  |
| RCH-PF                     | GTAATACGACTCACTATAGGGCGAATTGGGTACCCGAGTTTCAGATGTTTCTATTAATAAG              |                  |
| RCH-PR                     | TATTGTTCCAGGGAAAGCCTGTTGACTTACTCGAGAATCGGCATTTGCAAAGACATAAGAGT             | RCH1::TOP1β RNAi |
| 310RNAI-F                  | TTTCATTTGGAGAGGACACGGGGCCCCCTCGAGTAAGTCAACAGGCTTTCCC                       |                  |
| 310RNAI-R                  | ACGATCGGGGATCGGATCCCCGGGCTGCAGAAATGGTCATGACGGGTACG                         |                  |
| 310RNAI-2F                 | CTTCATCTTCTGACCCGTATGACCATTCTGCAGCCCATGTCTCAACGGTTTCCAG                    |                  |
| 310RNAI-2R                 | GCCAAATGTTTGAACGATCGGGGATCGGATCCTAAGTCAACAGGCTTTCCCTG                      |                  |
| ERF115-PF-3K               | CATGGTACCTCCACTCTCAACACTGTAC                                               | ERF115::GUS      |
| ERF115-PR                  | CATCTCGAGCTTTGCTAAATCTTTAAACC                                              |                  |
| ERF115-odsLICPF            | TAGTTGGAATAGGTTTCATGGCGAATTCAGGAAATTATGG                                   | ERF115-SRDX      |
| ERF115-SRDXPR              | AGTATGGAGTTGGGTTCTTAAGCGAAACCCAAACGGAGTTCTAGATCCAGATCGAGAAAACAGAAATTAGGAGG |                  |
| <b>qRT-PCR</b>             |                                                                            |                  |
| TOP1α-qPF                  | AATGGAACGAGACATGCATAC                                                      |                  |
| TOP1α-qPR                  | GCAAACCTCTCCAAAAGAGACT                                                     |                  |
| TOP1β-qPF                  | TACTTGGAAGAACCATATG                                                        |                  |
| TOP1β-qPR                  | TTCTCATACTTCTCTTTGTC                                                       |                  |
| RBR-qPF                    | GTTTTCCGACGCTTTATGT                                                        |                  |
| RBR-qPR                    | CCGGTCGTTTCTTACAGGAC                                                       |                  |
| EF1a-qPF                   | TGAGCACGCTCTTCTTGCTTTCA                                                    |                  |
| EF1a-qPR                   | GGTGGTGGCATCCATCTTGTTACA                                                   |                  |

Supplemental Table S1. List of primers used in this study.
